# Supplementary material
Source: publisher figshare collection journal article supplement (https://acs.figshare.com/ndownloader/files/5077102)
Supplement: Supplementary file 1 [file 5077102]

**Title:** Contrasting Melting Behavior of Zinc Stearate and Zinc Oleate

**Authors:** S.Barman and S.Vasudevan

## **Supporting Information**

1. (a) X-ray diffraction patterns of saturated fatty acid Zn soaps as function of chain length and (b) Plot of interlayer spacing vs. number of methylene units in the chains.
2. X-ray diffraction patterns of Zn-Stearate at different temperatures.
3. X-ray diffraction patterns of Zn-Oleate at different temperatures.
4. Methylene stretching modes in the infrared spectrum of Zn-Stearate at different temperatures.
5. Table of frequencies and assignments of the infrared progression bands of Zn-Stearate and Zn-Oleate

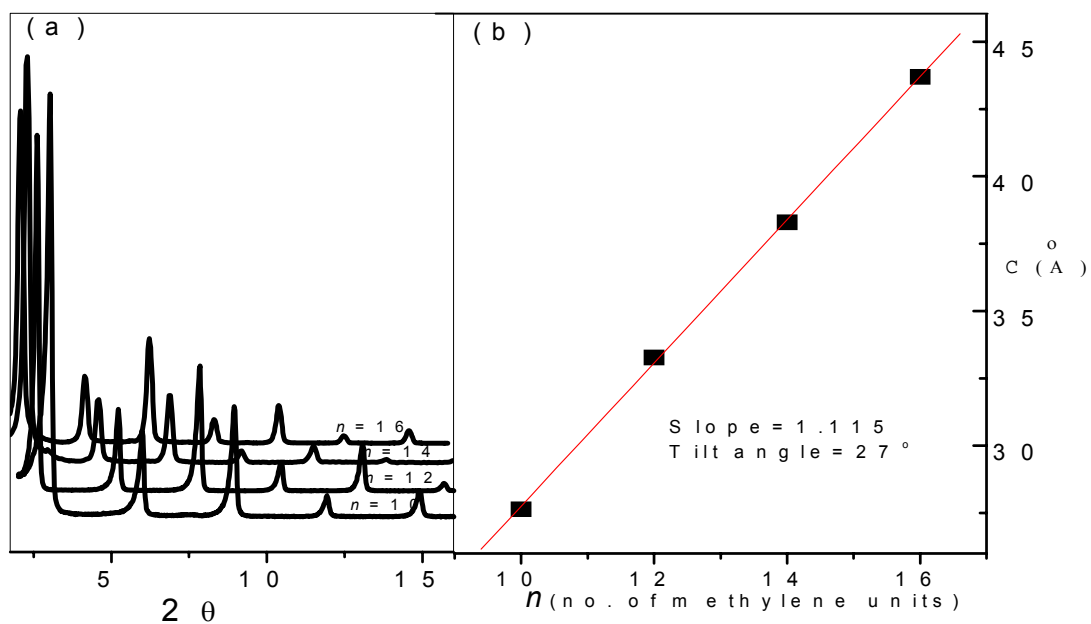

Figure: (a) X-ray diffraction patterns of saturated fatty acid Zn-soaps as function of chain length ( $n$  = number of methylene units) and (b) Plot of interlayer spacing,  $c$ , vs. number of methylene units in the chains.

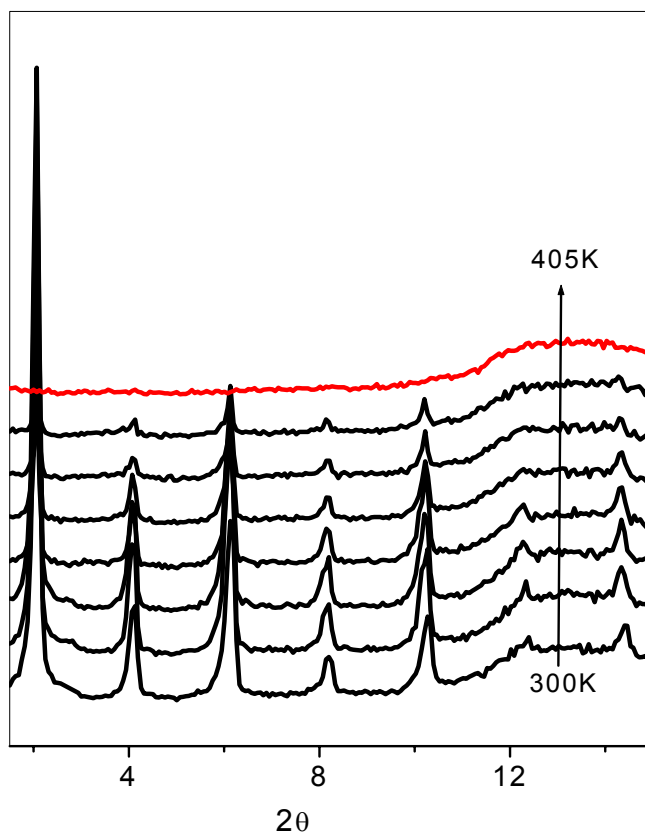

Figure: X-ray diffraction patterns of Zn-Stearate at different temperatures. The pattern at melt is shown in red.

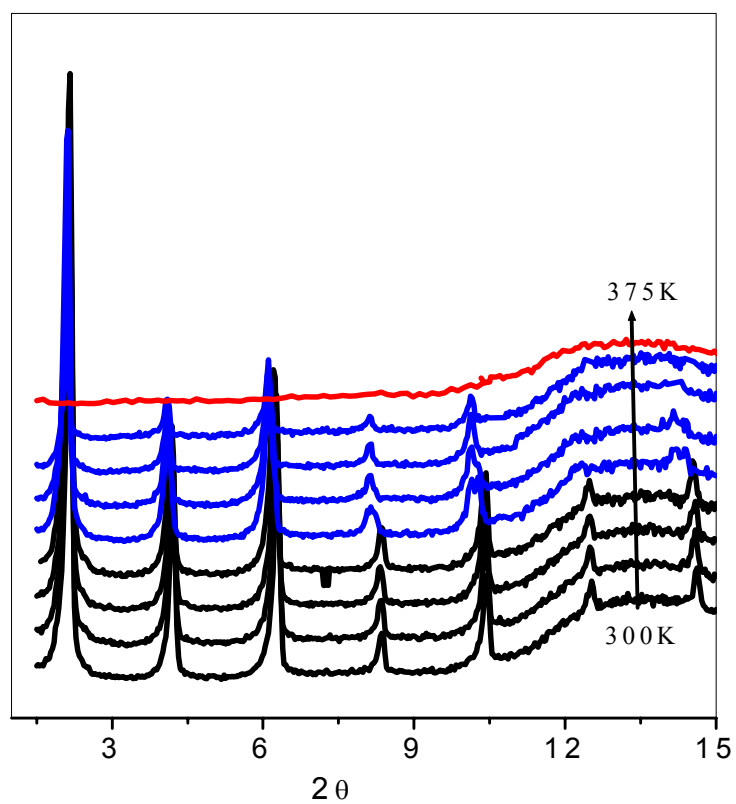

Figure: X-ray diffraction patterns of Zn-Oleate at different temperatures. The pattern above the transition at 357K is shown in blue. The pattern at melt is shown in red.

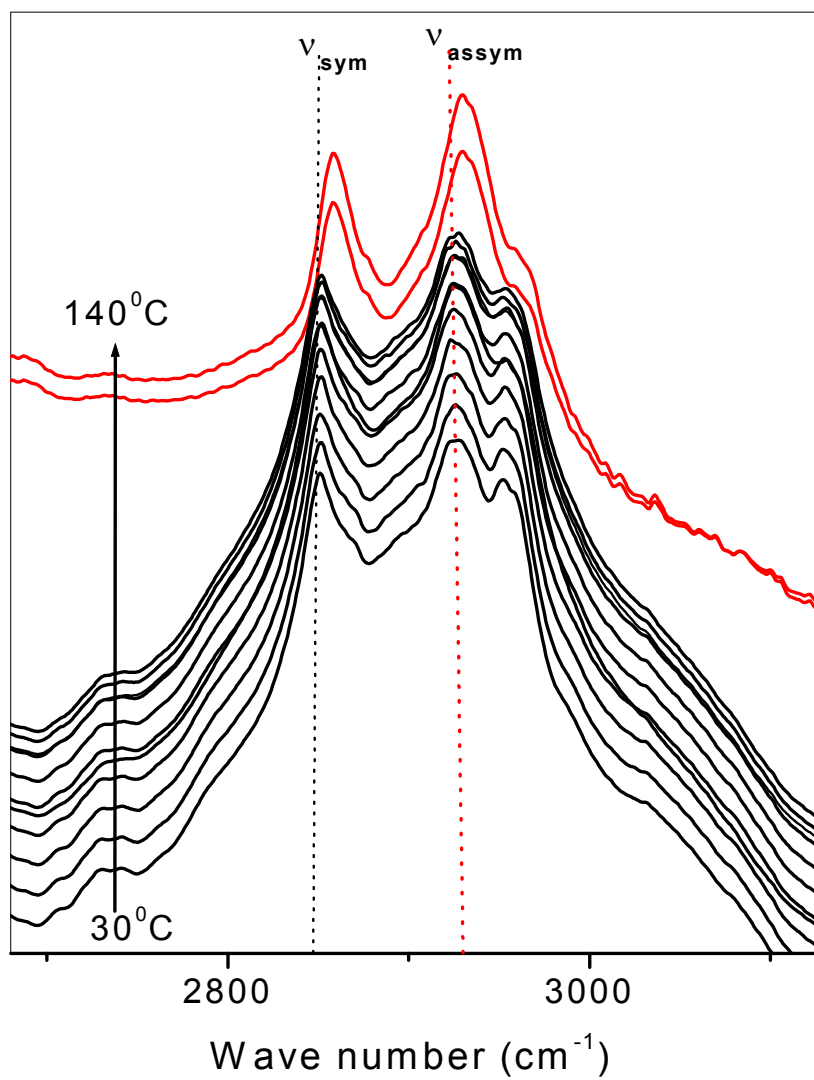

Figure . Methylene stretching modes of Zn-stearate at different temperatures. The spectra after melt is shown in red.

Table of frequencies and assignments of the methylene wagging ( $W_k$ ), twisting-rocking ( $T_k$ ), rocking-twisting( $R_k$ ) and C-C stretch ( $S_k$ ) progression bands in the infrared spectrum of Zn-stearate and Zn-oleate.( $n$  is the number of coupled *trans* methylene units considered in the assignment)

| Zn-Oleate<br>$n = 7$  |            | Zn-Stearate<br>$n = 16$ |                   |
|-----------------------|------------|-------------------------|-------------------|
| $\nu(\text{cm}^{-1})$ | Assignment | $\nu(\text{cm}^{-1})$   | Assignment        |
| 1352                  | $W_5$      | 1360                    | $W_{10}$          |
| 1323                  | $W_4$      | 1339                    | $W_9$             |
| 1304                  | $T_4$      | 1324                    | $W_8$             |
| 1280                  | $W_3$      | 1306                    | $W_7$             |
| 1258                  | $T_3$      | 1286                    | $W_6$             |
| 1237                  | $W_2$      | 1266                    | $W_5$             |
| 1214                  | $T_2$      | 1247                    | $W_4$             |
| 1200                  | $W_1$      | 1228                    | $W_3$             |
| 1192                  | $T_1$      | 1208                    | $W_2$             |
| 1094                  | $S_1$      | 1188                    | $W_1$             |
| 1066                  | $S_6$      | 1105                    | $S_1$             |
| 1049                  | $S_5$      | 1075                    | $S_2$             |
| 1028                  | $S_2$      | 1064                    | $S_{12}$          |
| 1010                  | $S_4$      | 1053                    | $S_{11}$          |
| 984                   | $S_3$      | 1041                    | $S_{10}$          |
| 953                   | $R_1$      | 1032                    | $S_9$             |
| 933                   | $R_2$      | 1016                    | $S_8$             |
| 889                   | $R_3$      | 990                     | $S_7$             |
| 849                   | $R_4$      | 970                     | $S_6$             |
| 826                   | $R_5$      | 911                     | $R_5$             |
| 781                   | $R_6$      | 874                     | $R_6$             |
| 721                   | $R_7$      | 840                     | $R_7$             |
|                       |            | 808                     | $R_8$             |
|                       |            | 780                     | $R_9$             |
|                       |            | 758                     | $R_{10}$          |
|                       |            | 745                     | $R_{11}$          |
|                       |            | 720                     | $R_{12} - R_{16}$ |
